# Supplementary material
Source: PubMed Central journal article supplement (PMC7020657)
Supplement: NIHMS1057892-supplement-SuppFig13.pdf [file NIHMS1057892-supplement-SuppFig13.pdf]

# Suppl. Fig. 13

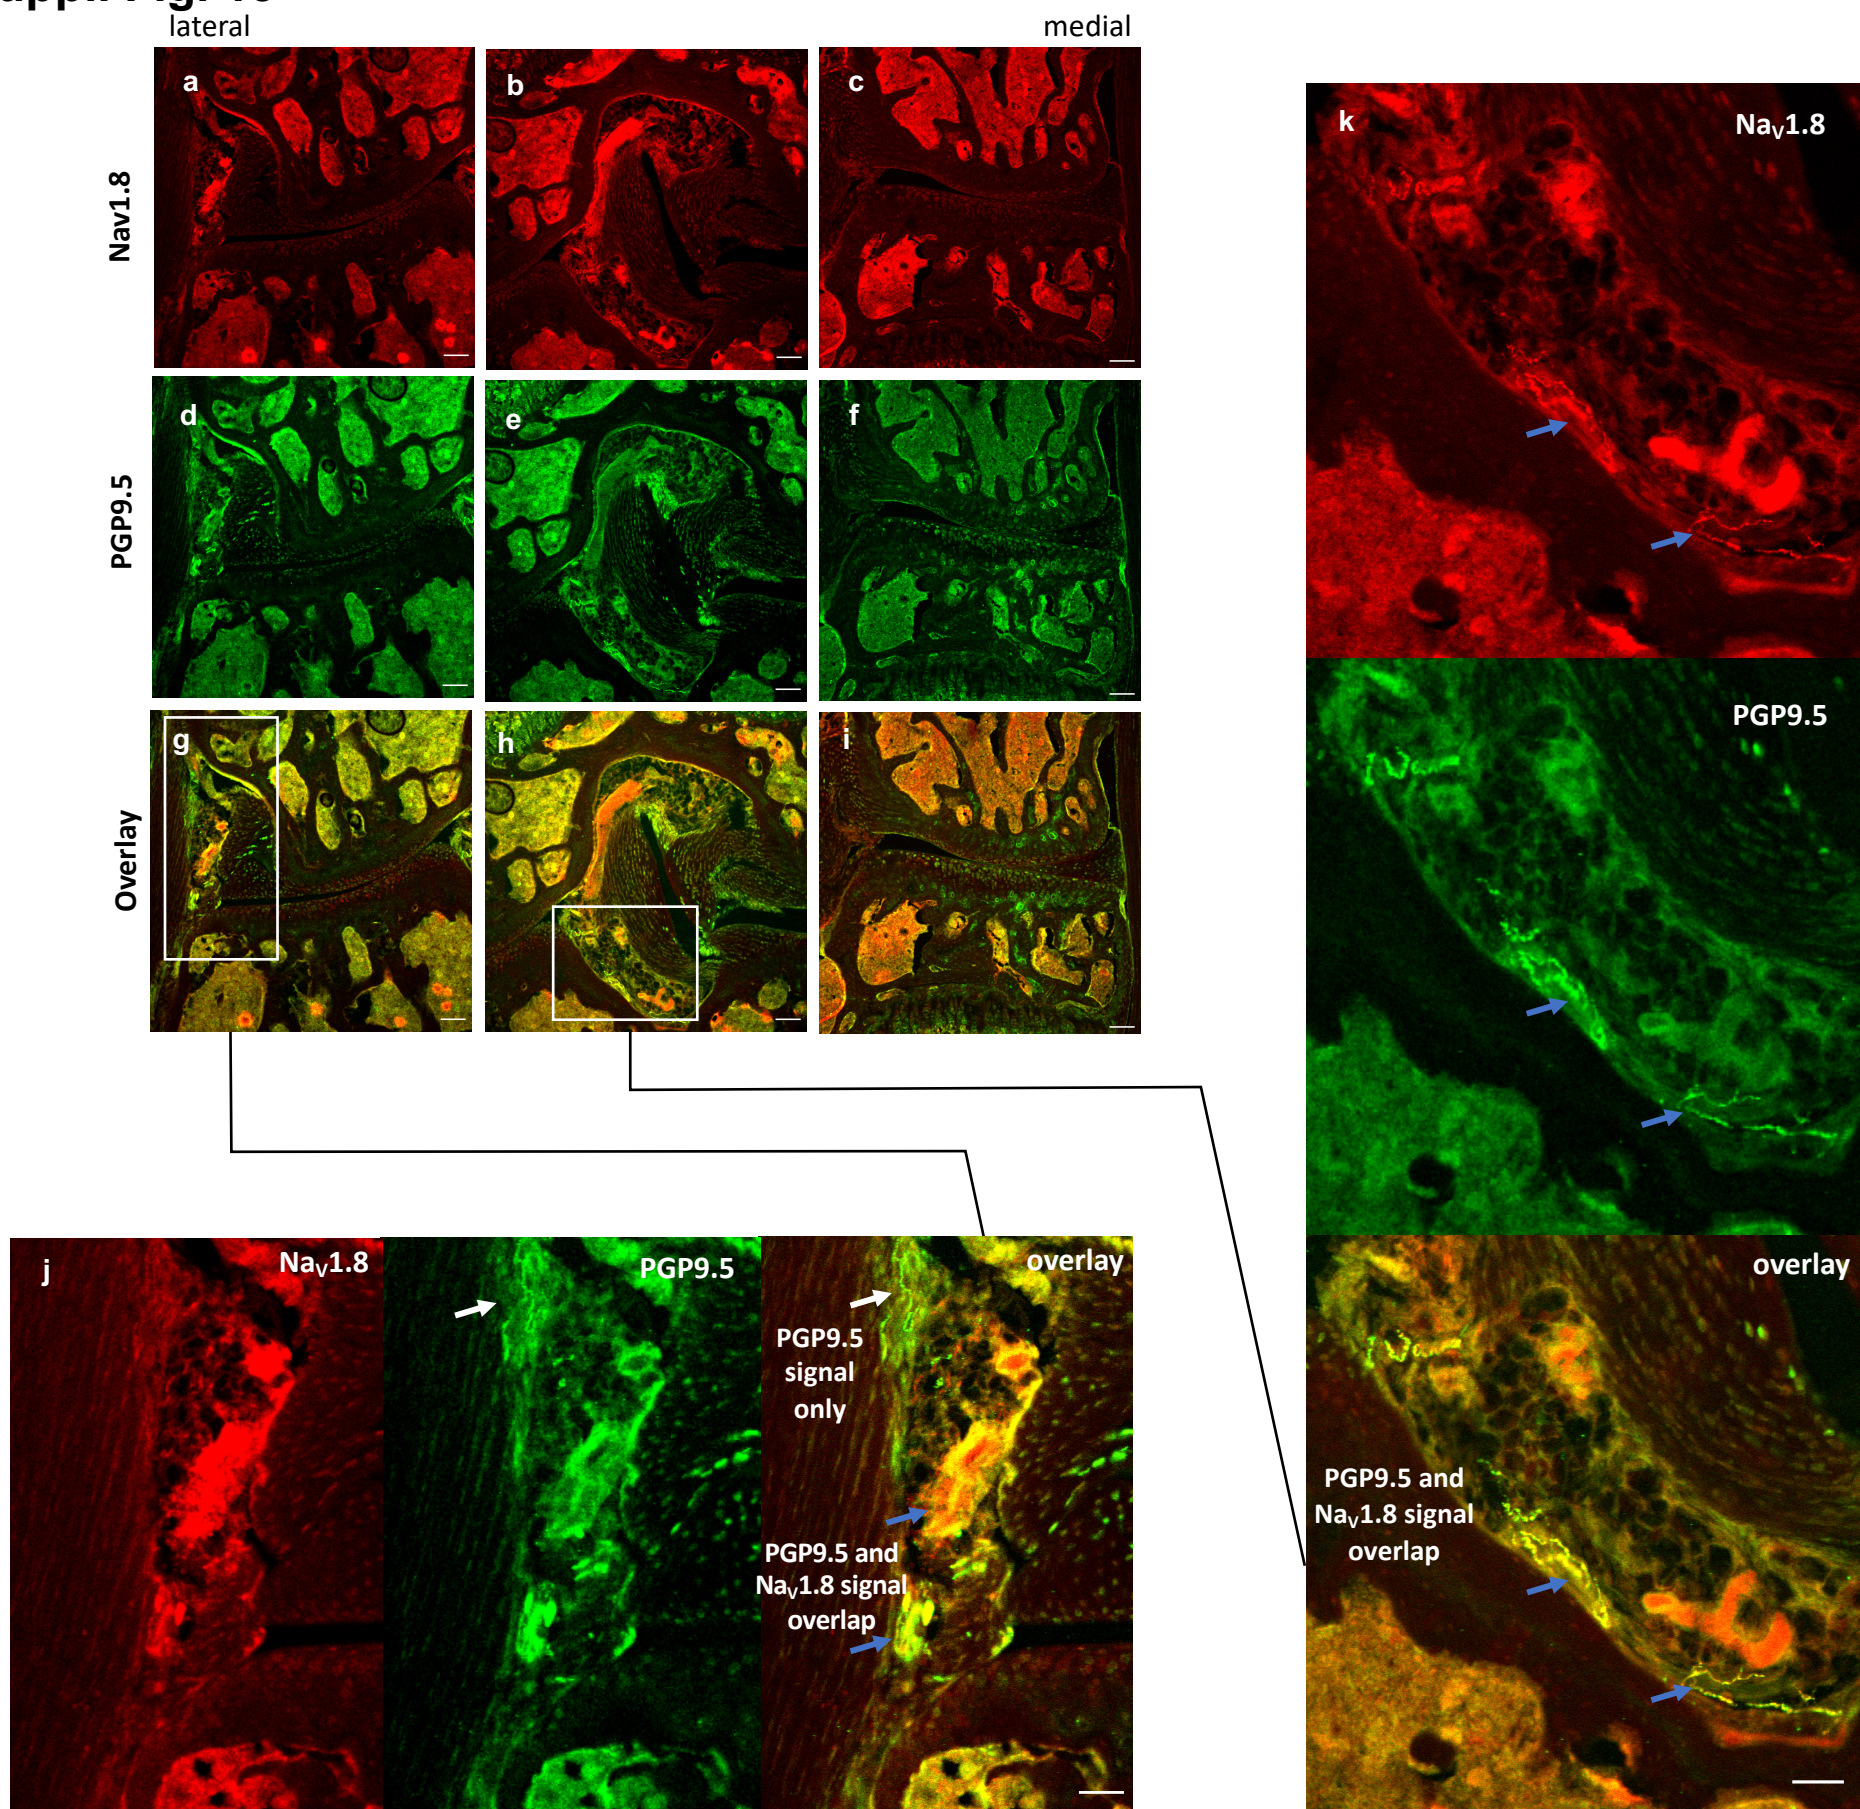

**Supplemental Fig. 13** Representative confocal images of the right knee of a 10-week old naive  $Na_v1.8$ -tdTomato mouse, immunostained with PGP9.5. (a-c)  $Na_v1.8$  signal in the lateral, middle and medial compartment of the knee; (d-e) PGP9.5 signal in the lateral, middle and medial compartment. (g-i) overlay between the two signals; (j) magnified image of the lateral synovium:  $Na_v1.8$ , PGP9.5 and the overlay of both signals are shown side by side. White arrows point to PGP9.5+ nerve fibers that are not  $Na_v1.8$  positive, The blue arrows show that all  $Na_v1.8$ + nerve fibers stain positively for PGP9.5; (k) magnified area of the cruciate ligament.  $Na_v1.8$ , PGP9.5 and the overlay of both signals are shown. The blue arrows indicate the overlap between  $Na_v1.8$ + nerve fibers and PGP9.5+ fibers. Scale bar = 100  $\mu$ m
